# Supplementary material for: International pilot external quality assessment scheme for analysis and reporting of circulating tumour DNA
Source: PubMed Central journal article supplement (PMC6085634; doi:10.1186/s12885-018-4694-x), 2018-08-09
Supplement: 12885_2018_4694_MOESM1_ESM.pdf [file 12885_2018_4694_MOESM1_ESM.pdf]

# INDIVIDUAL LABORATORY REPORT (ILR) - Lab XXX

SCHEME: IQNPath Liquid Biopsy EQA (pilot)

SEASON: 2017

| IQNPath Liquid Biopsy EQA (pilot) Case 1 RAS |                    |                                                                                                                                                                                       |
|----------------------------------------------|--------------------|---------------------------------------------------------------------------------------------------------------------------------------------------------------------------------------|
| Assessment Category                          | Score <sup>1</sup> | Comments (& deductions <sup>2</sup> )                                                                                                                                                 |
| Genotyping                                   | 2.00               | Correct result reported (method enables mutation characterisation AND correct HGVS nomenclature used) (0)<br>Comment: Reporting variants on genes that were not requested for testing |
| Interpretation                               | --                 | All essential interpretative elements provided<br>Mutations tested were not specified                                                                                                 |
| Patient Identifiers and Clerical Accuracy    | 2.00               | Comment(s) (0)<br><br>No pagination i.e. 1 of 2, 2 of 2 etc. A one page report is preferred.                                                                                          |

| IQNPath Liquid Biopsy EQA (pilot) Case 2 RAS |                    |                                                                                                           |
|----------------------------------------------|--------------------|-----------------------------------------------------------------------------------------------------------|
| Assessment Category                          | Score <sup>1</sup> | Comments (& deductions <sup>2</sup> )                                                                     |
| Genotyping                                   | 2.00               | Correct result reported (method enables mutation characterisation AND correct HGVS nomenclature used) (0) |
| Patient Identifiers and Clerical Accuracy    | 2.00               | No deductions (0)                                                                                         |

| IQNPath Liquid Biopsy EQA (pilot) Case 3 RAS |                    |                                                                                                           |
|----------------------------------------------|--------------------|-----------------------------------------------------------------------------------------------------------|
| Assessment Category                          | Score <sup>1</sup> | Comments (& deductions <sup>2</sup> )                                                                     |
| Genotyping                                   | 2.00               | Correct result reported (method enables mutation characterisation AND correct HGVS nomenclature used) (0) |
| Patient Identifiers and Clerical Accuracy    | 2.00               | No deductions (0)                                                                                         |

| IQNPath Liquid Biopsy EQA (pilot) Case 4 RAS |                    |                                                                                                           |
|----------------------------------------------|--------------------|-----------------------------------------------------------------------------------------------------------|
| Assessment Category                          | Score <sup>1</sup> | Comments (& deductions <sup>2</sup> )                                                                     |
| Genotyping                                   | 2.00               | Correct result reported (method enables mutation characterisation AND correct HGVS nomenclature used) (0) |
| Patient Identifiers and Clerical Accuracy    | 2.00               | No deduction (0)                                                                                          |

| IQNPath Liquid Biopsy EQA (pilot) Case 5 RAS |                    |                                                                                                                                                                                                                               |
|----------------------------------------------|--------------------|-------------------------------------------------------------------------------------------------------------------------------------------------------------------------------------------------------------------------------|
| Assessment Category                          | Score <sup>1</sup> | Comments (& deductions <sup>2</sup> )                                                                                                                                                                                         |
| Genotyping                                   | 2.00               | Correct result reported (method enables mutation characterisation AND correct HGVS nomenclature used) (0)                                                                                                                     |
| Interpretation                               | --                 | No interpretation provided<br>Mutations tested were not specified<br><br>It is recommended to state that the analysis of a plasma sample is not 100% sensitive and therefore the presence of a mutation may have been missed. |

<sup>1</sup> Maximum score is 2.00

<sup>2</sup> Deductions from the maximum score

<sup>3</sup> Green >= Scheme mean, Orange < Scheme mean, Red Poor performance.

NRS no results submitted. WDS withdrew from scheme

|                                                  |      |                  |
|--------------------------------------------------|------|------------------|
| <b>Patient Identifiers and Clerical Accuracy</b> | 2.00 | No deduction (0) |
|--------------------------------------------------|------|------------------|

| <b>IQNPath Liquid Biopsy EQA (pilot) Case 1 EGFR</b> |                          |                                                                                                                                                                                                          |
|------------------------------------------------------|--------------------------|----------------------------------------------------------------------------------------------------------------------------------------------------------------------------------------------------------|
| <b>Assessment Category</b>                           | <b>Score<sup>1</sup></b> | <b>Comments (&amp; deductions<sup>2</sup>)</b>                                                                                                                                                           |
| <b>Genotyping</b>                                    | 1.00                     | Mutation described incorrectly e.g. incorrect deletion reported at nucleotide or amino acid level (non-critical genotyping error) (1)<br>The variant should be EGFR c.2235_2249del p.(Glu746_Ala750del). |
| <b>Interpretation</b>                                | --                       | No interpretation provided                                                                                                                                                                               |
| <b>Patient Identifiers and Clerical Accuracy</b>     | 2.00                     | No deduction (0)                                                                                                                                                                                         |

| <b>IQNPath Liquid Biopsy EQA (pilot) Case 2 EGFR</b> |                          |                                                                                                                                                                                                          |
|------------------------------------------------------|--------------------------|----------------------------------------------------------------------------------------------------------------------------------------------------------------------------------------------------------|
| <b>Assessment Category</b>                           | <b>Score<sup>1</sup></b> | <b>Comments (&amp; deductions<sup>2</sup>)</b>                                                                                                                                                           |
| <b>Genotyping</b>                                    | 1.00                     | Mutation described incorrectly e.g. incorrect deletion reported at nucleotide or amino acid level (non-critical genotyping error) (1)<br>The variant should be EGFR c.2235_2249del p.(Glu746_Ala750del). |
| <b>Patient Identifiers and Clerical Accuracy</b>     | 2.00                     | No deduction (0)                                                                                                                                                                                         |

| <b>IQNPath Liquid Biopsy EQA (pilot) Case 3 EGFR</b> |                          |                                                                                                           |
|------------------------------------------------------|--------------------------|-----------------------------------------------------------------------------------------------------------|
| <b>Assessment Category</b>                           | <b>Score<sup>1</sup></b> | <b>Comments (&amp; deductions<sup>2</sup>)</b>                                                            |
| <b>Genotyping</b>                                    | 2.00                     | Correct result reported (method enables mutation characterisation AND correct HGVS nomenclature used) (0) |
| <b>Patient Identifiers and Clerical Accuracy</b>     | 2.00                     | No deduction (0)                                                                                          |

| <b>IQNPath Liquid Biopsy EQA (pilot) Case 4 EGFR</b> |                          |                                                                                                                                                                                                                                                                                                                                                                                                                  |
|------------------------------------------------------|--------------------------|------------------------------------------------------------------------------------------------------------------------------------------------------------------------------------------------------------------------------------------------------------------------------------------------------------------------------------------------------------------------------------------------------------------|
| <b>Assessment Category</b>                           | <b>Score<sup>1</sup></b> | <b>Comments (&amp; deductions<sup>2</sup>)</b>                                                                                                                                                                                                                                                                                                                                                                   |
| <b>Genotyping</b>                                    | --                       | Correct result reported (method enables mutation characterisation AND correct HGVS nomenclature used)<br>Not marked<br>This sample contained two mutations in EGFR at an allele frequency of approximately 1% (confirmed by our validation studies). Only 18 laboratories (56%) reported the presence of both these mutations in this sample and therefore it was decided to exclude this case from the marking. |
| <b>Interpretation</b>                                | --                       | Comment(s)<br>The interpretation is inadequate rather than incorrect. It should be stated that the combination of the p.L858R and p.T790M mutations will lead to a shortened duration of response to EGFR TKIs. However, the patient may benefit to future treatment with 3rd generation TKIs.                                                                                                                   |
| <b>Patient Identifiers and Clerical Accuracy</b>     | --                       | Not marked                                                                                                                                                                                                                                                                                                                                                                                                       |

| <b>IQNPath Liquid Biopsy EQA (pilot) Case 5 EGFR</b> |                          |                                                                                                                                                                               |
|------------------------------------------------------|--------------------------|-------------------------------------------------------------------------------------------------------------------------------------------------------------------------------|
| <b>Assessment Category</b>                           | <b>Score<sup>1</sup></b> | <b>Comments (&amp; deductions<sup>2</sup>)</b>                                                                                                                                |
| <b>Genotyping</b>                                    | 2.00                     | Correct result reported (method enables mutation characterisation AND correct HGVS nomenclature used) (0)                                                                     |
| <b>Interpretation</b>                                | --                       | No interpretation provided<br>Comment(s)<br>It should be stated that a negative result could be due to lack of sensitivity, and therefore that a biopsy should be considered. |
| <b>Patient Identifiers and Clerical Accuracy</b>     | 2.00                     | No deduction (0)                                                                                                                                                              |

<sup>1</sup> Maximum score is 2.00

<sup>2</sup> Deductions from the maximum score

<sup>3</sup> Green >= Scheme mean, Orange < Scheme mean, Red Poor performance.

NRS no results submitted. WDS withdrew from scheme

|                         |                                                                                                                                                                                                                                                    |
|-------------------------|----------------------------------------------------------------------------------------------------------------------------------------------------------------------------------------------------------------------------------------------------|
| <b>General Comments</b> | <p>General comment: No pagination i.e. 1 of 2, 2 of 2 etc. A one page report is preferred.</p> <p>Thank you for participating in this pilot EQA scheme. We look forward to welcoming you to our meeting in Florence and hearing your feedback.</p> |
|-------------------------|----------------------------------------------------------------------------------------------------------------------------------------------------------------------------------------------------------------------------------------------------|

## SUMMARY OF YOUR PERFORMANCE IN THIS SCHEME

| Assessment Category                         | Performance <sup>3</sup> (mean score) |
|---------------------------------------------|---------------------------------------|
| Genotyping                                  | 1.78                                  |
| Interpretation                              | Not marked                            |
| Patient Identifiers and Clerical Accuracy   | 2.00                                  |
| <b>Scheme result</b> (SATISFACTORY or POOR) | SATISFACTORY                          |

**NOTE:** The results above are subject to change depending on the results of the appeals process.

**The final results will be printed on the certificate of participation.**

**Report authorized by the head of the EQA provider on 22 June 2017.**

<sup>1</sup> Maximum score is 2.00

<sup>2</sup> Deductions from the maximum score

<sup>3</sup> **Green** >= Scheme mean, **Orange** < Scheme mean, **Red** Poor performance.

NRS no results submitted. WDS withdrew from scheme
